# Supplementary material
Source: PubMed Central journal article supplement (PMC3497404)
Supplement: IAI.00761-12_zii999099906so1.pdf [file IAI.00761-12_zii999099906so1.pdf]

### Supplemental table 1. Oligonucleotide sequences used for RT-PCR

Oligonucleotides, 5'-3'

Murine  $\beta$ -actin

Forward

TCC-TGA-GCG-CAA-GTA-CTC-TGT

Reverse

CTG-ATC-CAC-ATC-TGC-TGG-AAG

Probe

ATC-GGT-GGC-TCC-ATC-CTG-GC

Murine IFN- $\gamma$

Forward

GGA-TGC-ATT-CAT-GAG-TAT-TGC

Reverse

GCT-TCC-TGA-GGC-TGG-ATT-C

Probe

TTT-GAG-GTC-AAC-AAC-CCA-CAG-GTC-CA

Murine IL-4

Forward

AGA-TCA-TCG-GCA-TTT-TGA-ACG

Reverse

TTT-GGC-ACA-TCC-ATC-TCC-G

Probe

TCA-CAG-GAG-AAG-GGA-CGC-CAT-GC

Murine IL-17A

Forward

GCT-CCA-GAA-GGC-CCT-CAG

Reverse

CTT-TCC-CTC-CGC-ATT-GAC-A

Probe

ACC-TCA-ACC-GTT-CCA-CGT-CAC-CCT-G
