# Supplementary material
Source: PubMed Central journal article supplement (PMC3497404)
Supplement: IAI.00761-12_zii999099906so2.pdf [file IAI.00761-12_zii999099906so2.pdf]

**Figure S1. Flow cytometry analysis of IFN- $\gamma$ -producing cells in wild-type versus RAG<sup>-/-</sup> and RAG $\gamma$ c<sup>-/-</sup> C57BL/6 mice infected by *B. melitensis*.** Wild-type and deficient mice were injected i.p. with PBS (control) or 4x10<sup>4</sup> CFU of *B. melitensis*. Mice were sacrificed 5 days p.i. and spleen cells were collected and analyzed by flow cytometry. Cells were gated according to size and scatter to exclude dead cells and debris from analysis. Cells were first analyzed for Forward Size Scatter (FSC) versus IFN- $\gamma$  production (A) and then IFN- $\gamma$  positive cells were analyzed for CD3, NK1.1 and CD4 expression (B). In the selected quadrant, the number indicates the number (A) or the percentage of cells (B) per 1.5x10<sup>6</sup> spleen cells acquired and is representative of two independent experiments.

**Figure S2. Flow cytometry characterization of splenic T cell populations from RAG<sup>-/-</sup>, MHCII<sup>-/-</sup> and TAP-1<sup>-/-</sup> mice.** Wild-type, RAG, MHCII and TAP-1 deficient C57BL/6 mice were injected i.p. with PBS (control) or 4x10<sup>4</sup> CFU of *B. melitensis*. Mice were sacrificed 5 and 12 days p.i. and spleen cells were collected and analyzed by flow cytometry. Cells were gated according to size and scatter to exclude dead cells and debris from analysis. Cells were analyzed for CD3 and CD4 expression. In the selected quadrant, numbers indicate the percentage of cells per 1.5x10<sup>6</sup> spleen cells acquired and are representative of two independent experiments.

**Figure S3. CD28 and CD40 co-stimulatory molecules appear weakly implicated in the control of *B. melitensis* infection.** Wild-type, IL-12p35, MyD88, CD28 and CD40 deficient C57BL/6 mice were injected i.p. with PBS (control) or 4x10<sup>4</sup> CFU of *B. melitensis* and sacrificed at the indicated time. A, Spleen cells were collected for flow cytometry analysis. Cells were gated according to size and scatter to exclude dead cells and debris from analysis. Spleen cells from individual mice were first analyzed for Forward Size Scatter (FSC) and

IFN- $\gamma$  production. The data represent the number of IFN- $\gamma$  positive cells per  $1.5 \times 10^6$  spleen cells acquired. Each piece of data represents the value obtained from an individual spleen and the data are representative of two independent experiments. **B**, IFN- $\gamma$  positive cells were then analyzed for TCR $\beta$  and CD4 expression. The data represent the number of IFN- $\gamma^+$  TCR $\beta^+$  CD4 $^+$  cells from the groups described in B. Grey bars represent the median. Significant differences are denoted by an asterisk (\*) for  $p < 0.05$ .
