# Supplementary material
Source: PubMed Central journal article supplement (PMC3497404)

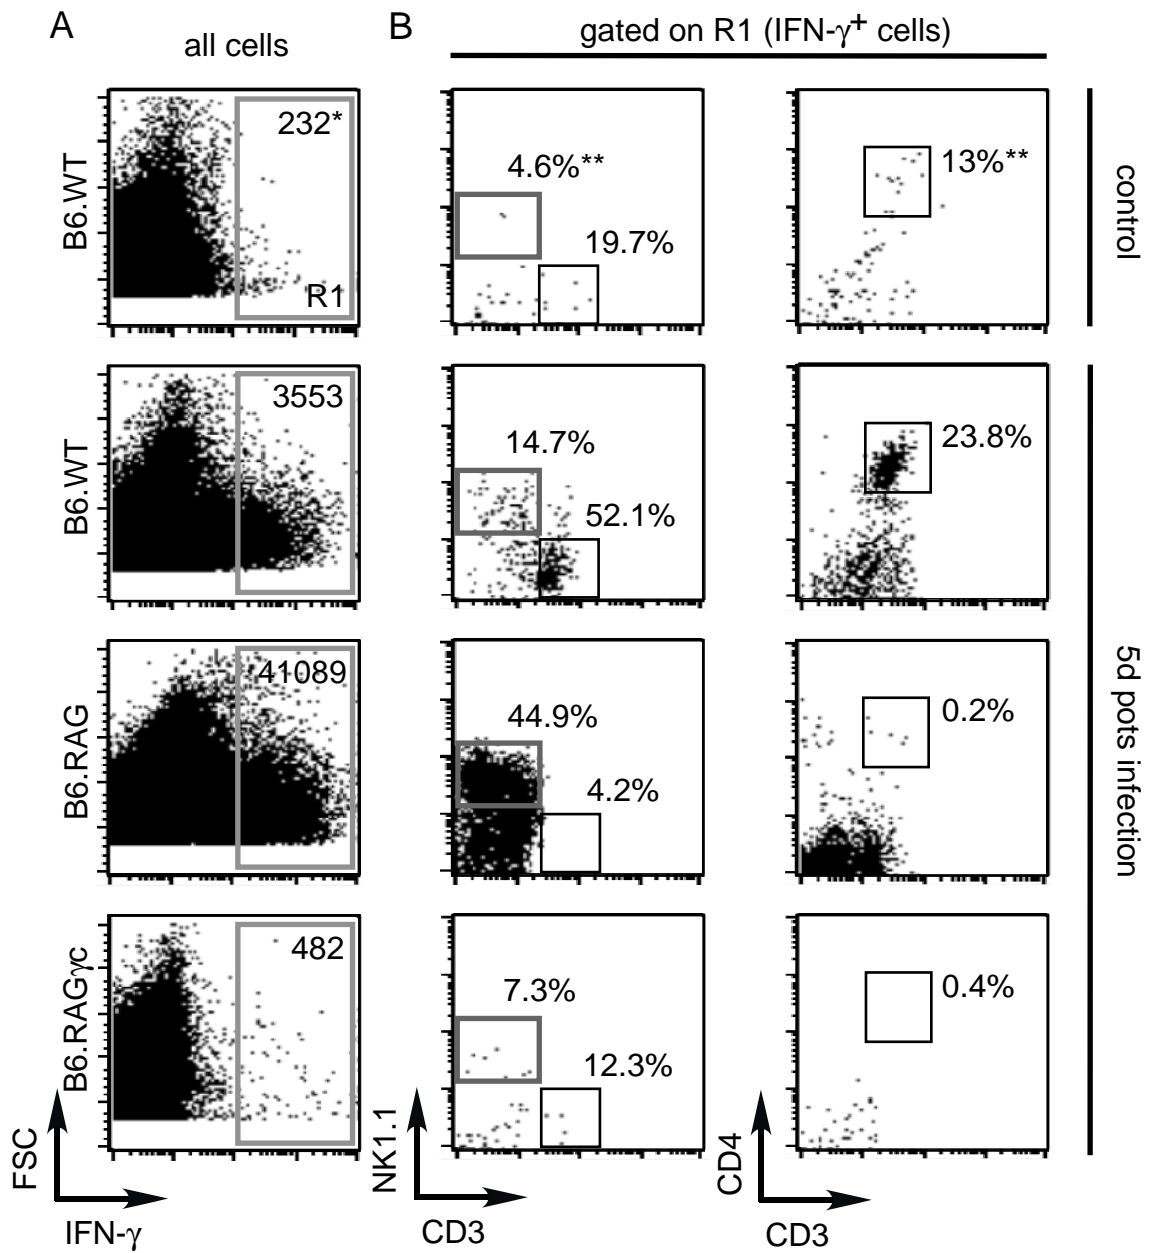

\* number or \*\* percentage of positive cells/ $1.5 \times 10^6$  spleen cells

Supplementary Figure 1 (S1)

Supplement: IAI.00761-12_zii999099906so3.pdf [file IAI.00761-12_zii999099906so3.pdf]

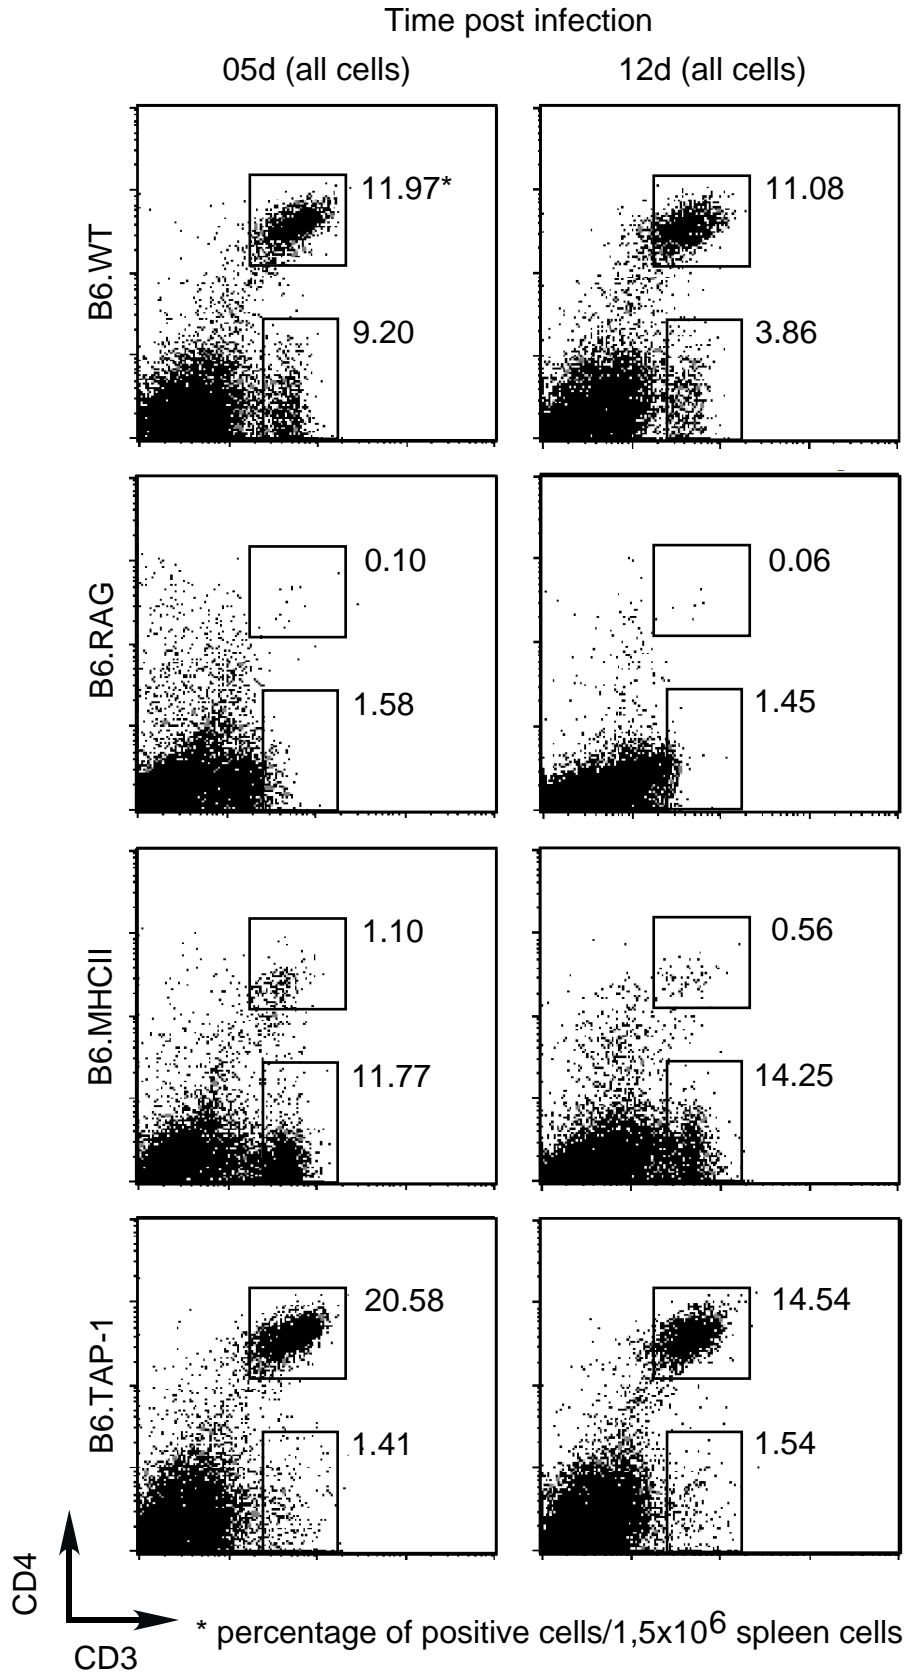

Supplementary Figure 2 (S2)

Supplement: IAI.00761-12_zii999099906so4.pdf [file IAI.00761-12_zii999099906so4.pdf]

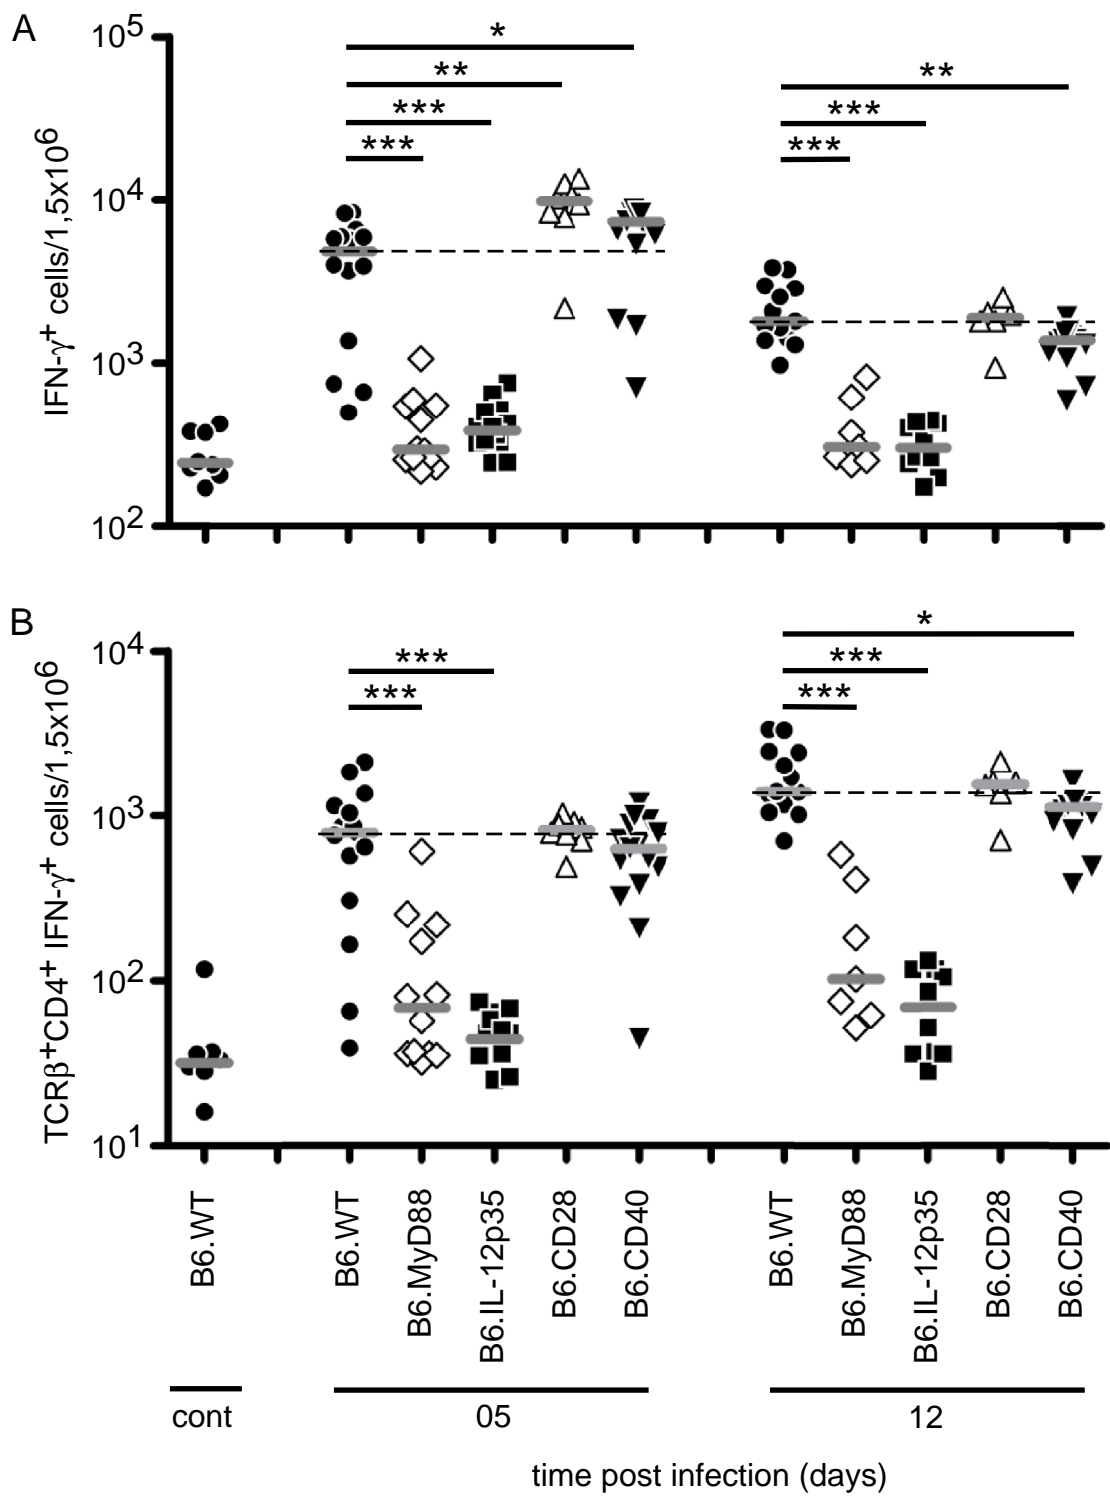

Supplementary Figure 3 (S3)

Supplement: IAI.00761-12_zii999099906so5.pdf [file IAI.00761-12_zii999099906so5.pdf]
